# Supplementary material for: Genome-Wide Association Study for Resistance to Tan Spot in Synthetic Hexaploid Wheat
Source: MDPI journal article supplement (doi:10.3390/plants11030433), 2022-02-05

**Supplementary Table S1.** Seedling tan spot reaction scores of synthetic hexaploid wheat (SHW) lines and their durum wheat (DW) parents

| Entry No. | Pedigree                                              | Reaction to PTR |       |                   |
|-----------|-------------------------------------------------------|-----------------|-------|-------------------|
|           |                                                       | AVG**           | Score | Number of progeny |
| 1         | <b>BOTNO*</b>                                         | 4.31            | S     | 1                 |
| 2         | BOTNO/AE.SQUARROSA (617)                              | 2.2             | MR    | --                |
| 3         | <b>68.111/RGB-U//WARD RESEL/3/STIL*</b>               | 3.56            | S     | 31                |
| 4         | 68.111/RGB-U//WARD RESEL/3/STIL/4/AE.SQUARROSA (332)  | 1.00            | R     | --                |
| 5         | 68.111/RGB-U//WARD RESEL/3/STIL/4/AE.SQUARROSA (1030) | 1.08            | R     | --                |
| 6         | 68.111/RGB-U//WARD RESEL/3/STIL/4/AE.SQUARROSA (389)  | 1.14            | R     | --                |
| 7         | 68.111/RGB-U//WARD RESEL/3/STIL/4/AE.SQUARROSA (630)  | 1.16            | R     | --                |
| 8         | 68.111/RGB-U//WARD RESEL/3/STIL/4/AE.SQUARROSA (628)  | 1.17            | R     | --                |
| 9         | 68.111/RGB-U//WARD RESEL/3/STIL/4/AE.SQUARROSA (392)  | 1.19            | R     | --                |
| 10        | 68.111/RGB-U//WARD RESEL/3/STIL/4/AE.SQUARROSA (684)  | 1.21            | R     | --                |
| 11        | 68.111/RGB-U//WARD RESEL/3/STIL/4/AE.SQUARROSA (631)  | 1.22            | R     | --                |
| 12        | 68.111/RGB-U//WARD RESEL/3/STIL/4/AE.SQUARROSA (631)  | 1.23            | R     | --                |
| 13        | 68.111/RGB-U//WARD RESEL/3/STIL/4/AE.SQUARROSA (627)  | 1.23            | R     | --                |
| 14        | 68.111/RGB-U//WARD RESEL/3/STIL/4/AE.SQUARROSA (659)  | 1.24            | R     | --                |
| 15        | 68.111/RGB-U//WARD RESEL/3/STIL/4/AE.SQUARROSA (390)  | 1.25            | R     | --                |
| 16        | 68.111/RGB-U//WARD RESEL/3/STIL/4/AE.SQUARROSA (623)  | 1.28            | R     | --                |
| 17        | 68.111/RGB-U//WARD RESEL/3/STIL/4/AE.SQUARROSA (1038) | 1.30            | R     | --                |
| 18        | 68.111/RGB-U//WARD RESEL/3/STIL/4/AE.SQUARROSA (781)  | 1.40            | R     | --                |
| 19        | 68.111/RGB-U//WARD RESEL/3/STIL/4/AE.SQUARROSA (1029) | 1.41            | R     | --                |
| 20        | 68.111/RGB-U//WARD RESEL/3/STIL/4/AE.SQUARROSA (675)  | 1.41            | R     | --                |
| 21        | 68.111/RGB-U//WARD RESEL/3/STIL/4/AE.SQUARROSA (385)  | 1.45            | R     | --                |
| 22        | 68.111/RGB-U//WARD RESEL/3/STIL/4/AE.SQUARROSA (386)  | 1.50            | R     | --                |
| 23        | 68.111/RGB-U//WARD RESEL/3/STIL/4/AE.SQUARROSA (625)  | 1.51            | R     | --                |

|    |                                                       |      |    |    |
|----|-------------------------------------------------------|------|----|----|
| 24 | 68.111/RGB-U//WARD RESEL/3/STIL/4/AE.SQUARROSA (768)  | 1.54 | R  | -- |
| 25 | 68.111/RGB-U//WARD RESEL/3/STIL/4/AE.SQUARROSA (783)  | 1.64 | R  | -- |
| 26 | 68.111/RGB-U//WARD RESEL/3/STIL/4/AE.SQUARROSA (164)  | 1.75 | R  | -- |
| 27 | 68.111/RGB-U//WARD RESEL/3/STIL/4/AE.SQUARROSA (672)  | 1.83 | MR | -- |
| 28 | 68.111/RGB-U//WARD RESEL/3/STIL/4/AE.SQUARROSA (681)  | 1.84 | MR | -- |
| 29 | 68.111/RGB-U//WARD RESEL/3/STIL/4/AE.SQUARROSA (685)  | 1.85 | MR | -- |
| 30 | 68.111/RGB-U//WARD RESEL/3/STIL/4/AE.SQUARROSA (700)  | 1.88 | MR | -- |
| 31 | 68.111/RGB-U//WARD RESEL/3/STIL/4/AE.SQUARROSA (662)  | 1.92 | MR | -- |
| 32 | 68.111/RGB-U//WARD RESEL/3/STIL/4/AE.SQUARROSA (1090) | 2.05 | MR | -- |
| 33 | 68.111/RGB-U//WARD RESEL/3/STIL/4/AE.SQUARROSA (188)  | 2.29 | MR | -- |
| 34 | 68.111/RGB-U//WARD RESEL/3/STIL/4/AE.SQUARROSA (1010) | 2.68 | MS | -- |
| 35 | <b>68.111/RGB-U//WARD*</b>                            | 3.15 | MS | 7  |
| 36 | 68.111/RGB-U//WARD/3/AE.SQUARROSA (202)               | 1.75 | MR | -- |
| 37 | 68.111/RGB-U//WARD/3/AE.SQUARROSA (426)               | 1.00 | R  | -- |
| 38 | 68.111/RGB-U//WARD/3/AE.SQUARROSA (316)               | 1.39 | R  | -- |
| 39 | 68.111/RGB-U//WARD/3/AE.SQUARROSA (329)               | 1.43 | R  | -- |
| 40 | 68.111/RGB-U//WARD/3/AE.SQUARROSA (322)               | 1.50 | R  | -- |
| 41 | 68.111/RGB-U//WARD/3/AE.SQUARROSA (321)               | 1.73 | MR | -- |
| 42 | 68.111/RGB-U//WARD/3/AE.SQUARROSA (511)               | 2.09 | MR | -- |
| 43 | <b>68.111/RGB-U//WARD/3/FGO/4/RABI*</b>               | 2.41 | MR | 31 |
| 44 | 68.111/RGB-U//WARD/3/FGO/4/RABI/5/AE.SQUARROSA (882)  | 1.03 | R  | -- |
| 45 | 68.111/RGB-U//WARD/3/FGO/4/RABI/5/AE.SQUARROSA (878)  | 1.08 | R  | -- |
| 46 | 68.111/RGB-U//WARD/3/FGO/4/RABI/5/AE.SQUARROSA (701)  | 1.08 | R  | -- |
| 47 | 68.111/RGB-U//WARD/3/FGO/4/RABI/5/AE.SQUARROSA (1050) | 1.08 | R  | -- |
| 48 | 68.111/RGB-U//WARD/3/FGO/4/RABI/5/AE.SQUARROSA (675)  | 1.08 | R  | -- |
| 49 | 68.111/RGB-U//WARD/3/FGO/4/RABI/5/AE.SQUARROSA (778)  | 1.08 | R  | -- |
| 50 | 68.111/RGB-U//WARD/3/FGO/4/RABI/5/AE.SQUARROSA (768)  | 1.10 | R  | -- |
| 51 | 68.111/RGB-U//WARD/3/FGO/4/RABI/5/AE.SQUARROSA (720)  | 1.13 | R  | -- |
| 52 | 68.111/RGB-U//WARD/3/FGO/4/RABI/5/AE.SQUARROSA (809)  | 1.20 | R  | -- |
| 53 | 68.111/RGB-U//WARD/3/FGO/4/RABI/5/AE.SQUARROSA (710)  | 1.21 | R  | -- |

|    |                                                       |      |    |    |
|----|-------------------------------------------------------|------|----|----|
| 54 | 68.111/RGB-U//WARD/3/FGO/4/RABI/5/AE.SQUARROSA (661)  | 1.27 | R  | -- |
| 55 | 68.111/RGB-U//WARD/3/FGO/4/RABI/5/AE.SQUARROSA (191)  | 1.28 | R  | -- |
| 56 | 68.111/RGB-U//WARD/3/FGO/4/RABI/5/AE.SQUARROSA (878)  | 1.29 | R  | -- |
| 57 | 68.111/RGB-U//WARD/3/FGO/4/RABI/5/AE.SQUARROSA (719)  | 1.30 | R  | -- |
| 58 | 68.111/RGB-U//WARD/3/FGO/4/RABI/5/AE.SQUARROSA (974)  | 1.30 | R  | -- |
| 59 | 68.111/RGB-U//WARD/3/FGO/4/RABI/5/AE.SQUARROSA (905)  | 1.30 | R  | -- |
| 60 | 68.111/RGB-U//WARD/3/FGO/4/RABI/5/AE.SQUARROSA (1093) | 1.33 | R  | -- |
| 61 | 68.111/RGB-U//WARD/3/FGO/4/RABI/5/AE.SQUARROSA (788)  | 1.35 | R  | -- |
| 62 | 68.111/RGB-U//WARD/3/FGO/4/RABI/5/AE.SQUARROSA (878)  | 1.42 | R  | -- |
| 63 | 68.111/RGB-U//WARD/3/FGO/4/RABI/5/AE.SQUARROSA (504)  | 1.43 | R  | -- |
| 64 | 68.111/RGB-U//WARD/3/FGO/4/RABI/5/AE.SQUARROSA (809)  | 1.50 | R  | -- |
| 65 | 68.111/RGB-U//WARD/3/FGO/4/RABI/5/AE.SQUARROSA (878)  | 1.58 | MR | -- |
| 66 | 68.111/RGB-U//WARD/3/FGO/4/RABI/5/AE.SQUARROSA (784)  | 1.59 | MR | -- |
| 67 | 68.111/RGB-U//WARD/3/FGO/4/RABI/5/AE.SQUARROSA (878)  | 1.60 | MR | -- |
| 68 | 68.111/RGB-U//WARD/3/FGO/4/RABI/5/AE.SQUARROSA (878)  | 1.67 | MR | -- |
| 69 | 68.111/RGB-U//WARD/3/FGO/4/RABI/5/AE.SQUARROSA (709)  | 1.84 | MR | -- |
| 70 | 68.111/RGB-U//WARD/3/FGO/4/RABI/5/AE.SQUARROSA (878)  | 1.91 | MR | -- |
| 71 | 68.111/RGB-U//WARD/3/FGO/4/RABI/5/AE.SQUARROSA (809)  | 1.92 | MR | -- |
| 72 | 68.111/RGB-U//WARD/3/FGO/4/RABI/5/AE.SQUARROSA (1010) | 1.99 | MR | -- |
| 73 | 68.111/RGB-U//WARD/3/FGO/4/RABI/5/AE.SQUARROSA (878)  | 2.42 | MR | -- |
| 74 | 68.111/RGB-U//WARD/3/FGO/4/RABI/5/AE.SQUARROSA (878)  | 2.61 | MS | -- |
| 75 | <b>68112/WARD*</b>                                    | 2.34 | MR | 4  |
| 76 | 68112/WARD//AE.SQUARROSA (369)                        | 1.05 | R  |    |
| 77 | 68112/WARD//AE.SQUARROSA (369)                        | 1.15 | R  |    |
| 78 | 68112/WARD//AE.SQUARROSA (369)                        | 1.21 | R  |    |
| 79 | 68112/WARD//AE.SQUARROSA (369)                        | 1.22 | R  |    |
| 80 | <b>6973/WARD.7463//74110*</b>                         | 3.34 | MS | 3  |
| 81 | 6973/WARD.7463//74110/3/AE.SQUARROSA (665)            | 1.00 | R  |    |
| 82 | 6973/WARD.7463//74110/3/AE.SQUARROSA (438)            | 1.11 | R  |    |
| 83 | 6973/WARD.7463//74110/3/AE.SQUARROSA (35A)            | 2.63 | MS |    |

|     |                                                                  |      |    |    |
|-----|------------------------------------------------------------------|------|----|----|
| 84  | <b>ACONCHI 89*</b>                                               | 2.55 | MS | 4  |
| 85  | ACO89/AE.SQUARROSA (178)                                         | 1.50 | R  |    |
| 86  | ACO89/AE.SQUARROSA (309)                                         | 1.08 | R  |    |
| 87  | ACO89/AE.SQUARROSA (290)                                         | 1.48 | R  |    |
| 88  | ACO89/AE.SQUARROSA (282)                                         | 2.11 | MR |    |
| 89  | <b>ALG86/4/FGO/PALES//MEXI_1/3/RUFF/FGO/5/ENTE*</b>              | 2.94 | MS | 3  |
| 90  | ALG86/4/FGO/PALES//MEXI_1/3/RUFF/FGO/5/ENTE/6/AE.SQUARROSA (389) | 2.08 | MR |    |
| 91  | ALG86/4/FGO/PALES//MEXI_1/3/RUFF/FGO/5/ENTE/6/AE.SQUARROSA (451) | 2.31 | MR |    |
| 92  | ALG86/4/FGO/PALES//MEXI_1/3/RUFF/FGO/5/ENTE/6/AE.SQUARROSA (723) | 1.73 | MR |    |
| 93  | <b>ALTAR 84*</b>                                                 | 2.59 | MS | 20 |
| 94  | ALTAR 84/AE.SQUARROSA (1012)                                     | 2.06 | MR |    |
| 95  | ALTAR 84/AE.SQUARROSA (174)                                      | 2.05 | MR |    |
| 96  | ALTAR 84/AE.SQUARROSA (188)                                      | 1.12 | R  |    |
| 97  | ALTAR 84/AE.SQUARROSA (191)                                      | 1.06 | R  |    |
| 98  | ALTAR 84/AE.SQUARROSA (198)                                      | 1.89 | R  |    |
| 99  | ALTAR 84/AE.SQUARROSA (220)                                      | 1.44 | R  |    |
| 100 | ALTAR 84/AE.SQUARROSA (221)                                      | 1.11 | R  |    |
| 101 | ALTAR 84/AE.SQUARROSA (223)                                      | 1.39 | R  |    |
| 102 | ALTAR 84/AE.SQUARROSA (224)                                      | 1.37 | R  |    |
| 103 | ALTAR 84/AE.SQUARROSA (224)                                      | 1.22 | R  |    |
| 104 | ALTAR 84/AE.SQUARROSA (224)                                      | 1.04 | R  |    |
| 105 | ALTAR 84/AE.SQUARROSA (244)                                      | 1.69 | MR |    |
| 106 | ALTAR 84/AE.SQUARROSA (291)                                      | 1.34 | R  |    |
| 107 | ALTAR 84/AE.SQUARROSA (319)                                      | 1.45 | R  |    |
| 108 | ALTAR 84/AE.SQUARROSA (333)                                      | 1.94 | MR |    |
| 109 | ALTAR 84/AE.SQUARROSA (507)                                      | 2.19 | MR |    |
| 110 | ALTAR 84/AE.SQUARROSA (531)                                      | 1.52 | R  |    |
| 111 | ALTAR 84/AE.SQUARROSA (539)                                      | 2.52 | MR |    |

|     |                                    |      |    |    |
|-----|------------------------------------|------|----|----|
| 112 | ALTAR 84/AE.SQUARROSA (793)        | 1.46 | R  |    |
| 113 | ALTAR 84/AE.SQUARROSA(Y86-87 S401) | 1.28 | R  |    |
| 114 | <b>ARLIN_1*</b>                    | 2.44 | MR | 13 |
| 115 | AE.SQUARROSA (1031)/ARLIN_1        | 1.02 | R  |    |
| 116 | ARLIN/AE.SQUARROSA (283)           | 2.29 | MR |    |
| 117 | ARLIN/AE.SQUARROSA (317)           | 1.16 | R  |    |
| 118 | ARLIN/AE.SQUARROSA (410)           | 2.65 | MS |    |
| 119 | ARLIN_1/AE.SQUARROSA (1018)        | 1.07 | R  |    |
| 120 | ARLIN_1/AE.SQUARROSA (310)         | 1.00 | R  |    |
| 121 | ARLIN_1/AE.SQUARROSA (320)         | 1.00 | R  |    |
| 122 | ARLIN_1/AE.SQUARROSA (333)         | 1.53 | R  |    |
| 123 | ARLIN_1/AE.SQUARROSA (335)         | 1.03 | R  |    |
| 124 | ARLIN_1/AE.SQUARROSA (368)         | 1.23 | R  |    |
| 125 | ARLIN_1/AE.SQUARROSA (430)         | 1.06 | R  |    |
| 126 | ARLIN_1/AE.SQUARROSA (536)         | 2.40 | MR |    |
| 127 | ARLIN_1/AE.SQUARROSA (802)         | 1.59 | MR |    |
| 128 | <b>CERCETA*</b>                    | 1.85 | MR | 54 |
| 129 | CETA/AE.SQUARROSA (263)            | 1.65 | MR | -- |
| 130 | CETA/AE.SQUARROSA (1016)           | 1.66 | MR | -- |
| 131 | CETA/AE.SQUARROSA (1018)           | 1.22 | R  | -- |
| 132 | CETA/AE.SQUARROSA (1026)           | 1.20 | R  | -- |
| 133 | CETA/AE.SQUARROSA (1027)           | 1.09 | R  | -- |
| 134 | CETA/AE.SQUARROSA (1030)           | 1.24 | R  | -- |
| 135 | CETA/AE.SQUARROSA (1031)           | 1.28 | R  | -- |
| 136 | CETA/AE.SQUARROSA (1036)           | 1.73 | MR | -- |
| 137 | CETA/AE.SQUARROSA (1038)           | 1.00 | R  | -- |
| 138 | CETA/AE.SQUARROSA (1043)           | 1.88 | MR | -- |
| 139 | CETA/AE.SQUARROSA (1047)           | 1.70 | MR | -- |
| 140 | CETA/AE.SQUARROSA (1053)           | 1.87 | MR | -- |
| 141 | CETA/AE.SQUARROSA (1073)           | 1.69 | MR | -- |

|     |                          |      |    |    |
|-----|--------------------------|------|----|----|
| 142 | CETA/AE.SQUARROSA (1090) | 1.72 | MR | -- |
| 143 | CETA/AE.SQUARROSA (166)  | 1.13 | R  | -- |
| 144 | CETA/AE.SQUARROSA (174)  | 1.47 | R  | -- |
| 145 | CETA/AE.SQUARROSA (187)  | 1.22 | R  | -- |
| 146 | CETA/AE.SQUARROSA (230)  | 1.05 | R  | -- |
| 147 | CETA/AE.SQUARROSA (231)  | 1.79 | MR | -- |
| 148 | CETA/AE.SQUARROSA (244)  | 2.25 | MR | -- |
| 149 | CETA/AE.SQUARROSA (246)  | 2.30 | MR | -- |
| 150 | CETA/AE.SQUARROSA (248)  | 2.88 | MS | -- |
| 151 | CETA/AE.SQUARROSA (262)  | 1.33 | R  | -- |
| 152 | CETA/AE.SQUARROSA (310)  | 1.03 | R  | -- |
| 153 | CETA/AE.SQUARROSA (335)  | 1.09 | R  | -- |
| 154 | CETA/AE.SQUARROSA (356)  | 1.86 | R  | -- |
| 155 | CETA/AE.SQUARROSA (371)  | 1.17 | R  | -- |
| 156 | CETA/AE.SQUARROSA (391)  | 1.16 | R  | -- |
| 157 | CETA/AE.SQUARROSA (418)  | 1.08 | R  | -- |
| 158 | CETA/AE.SQUARROSA (442)  | 1.35 | R  | -- |
| 159 | CETA/AE.SQUARROSA (445)  | 2.30 | MR | -- |
| 160 | CETA/AE.SQUARROSA (450)  | 1.70 | MR |    |
| 161 | CETA/AE.SQUARROSA (485)  | 1.78 | MR |    |
| 162 | CETA/AE.SQUARROSA (496)  | 1.08 | R  |    |
| 163 | CETA/AE.SQUARROSA (499)  | 1.52 | R  |    |
| 164 | CETA/AE.SQUARROSA (506)  | 2.42 | MR |    |
| 165 | CETA/AE.SQUARROSA (525)  | 1.86 | MR |    |
| 166 | CETA/AE.SQUARROSA (530)  | 2.43 | MR |    |
| 167 | CETA/AE.SQUARROSA (533)  | 2.66 | MS |    |
| 168 | CETA/AE.SQUARROSA (539)  | 2.46 | MR |    |
| 169 | CETA/AE.SQUARROSA (540)  | 2.48 | MR |    |
| 170 | CETA/AE.SQUARROSA (541)  | 2.72 | MS |    |
| 171 | CETA/AE.SQUARROSA (615)  | 1.52 | R  |    |

|     |                                                 |      |    |    |
|-----|-------------------------------------------------|------|----|----|
| 172 | CETA/AE.SQUARROSA (629)                         | 1.74 | MR |    |
| 173 | CETA/AE.SQUARROSA (681)                         | 1.35 | R  |    |
| 174 | CETA/AE.SQUARROSA (682)                         | 1.52 | R  |    |
| 175 | CETA/AE.SQUARROSA (683)                         | 1.51 | R  |    |
| 176 | CETA/AE.SQUARROSA (684)                         | 1.27 | R  |    |
| 177 | CETA/AE.SQUARROSA (750)                         | 1.68 | MR |    |
| 178 | CETA/AE.SQUARROSA (783)                         | 1.23 | R  |    |
| 179 | CETA/AE.SQUARROSA (796)                         | 1.53 | R  |    |
| 180 | CETA/AE.SQUARROSA (895)                         | 1.35 | R  |    |
| 181 | CETA/AE.SQUARROSA (895)                         | 1.11 | R  |    |
| 182 | CETA/T.URARTU (557)                             | 1.05 | R  |    |
| 183 | <b>CHEN_7*</b>                                  | 3.01 | MS | 1  |
| 184 | CHEN_7/AE.SQUARROSA (429)                       | 1.19 | R  |    |
| 185 | <b>CPI8/GEDIZ/3/GOO//ALB/CRA*</b>               | 3.25 | MS | 31 |
| 186 | CPI8/GEDIZ/3/GOO//ALB/CRA/4/AE.SQUARROSA (1017) | 1.95 | MR |    |
| 187 | CPI8/GEDIZ/3/GOO//ALB/CRA/4/AE.SQUARROSA (1018) | 1.69 | MR |    |
| 188 | CPI8/GEDIZ/3/GOO//ALB/CRA/4/AE.SQUARROSA (1021) | 1.78 | MR |    |
| 189 | CPI8/GEDIZ/3/GOO//ALB/CRA/4/AE.SQUARROSA (1026) | 1.86 | MR |    |
| 190 | CPI8/GEDIZ/3/GOO//ALB/CRA/4/AE.SQUARROSA (1029) | 1.69 | MR |    |
| 191 | CPI8/GEDIZ/3/GOO//ALB/CRA/4/AE.SQUARROSA (1031) | 1.83 | MR |    |
| 192 | CPI8/GEDIZ/3/GOO//ALB/CRA/4/AE.SQUARROSA (184)  | 1.69 | MR |    |
| 193 | CPI8/GEDIZ/3/GOO//ALB/CRA/4/AE.SQUARROSA (188)  | 2.49 | MR |    |
| 194 | CPI8/GEDIZ/3/GOO//ALB/CRA/4/AE.SQUARROSA (193)  | 2.60 | MS |    |
| 195 | CPI8/GEDIZ/3/GOO//ALB/CRA/4/AE.SQUARROSA (196)  | 1.81 | MR |    |
| 196 | CPI8/GEDIZ/3/GOO//ALB/CRA/4/AE.SQUARROSA (205)  | 2.14 | MR |    |
| 197 | CPI8/GEDIZ/3/GOO//ALB/CRA/4/AE.SQUARROSA (208)  | 2.17 | MR |    |
| 198 | CPI8/GEDIZ/3/GOO//ALB/CRA/4/AE.SQUARROSA (215)  | 1.64 | MR |    |
| 199 | CPI8/GEDIZ/3/GOO//ALB/CRA/4/AE.SQUARROSA (227)  | 2.03 | MR |    |
| 200 | CPI8/GEDIZ/3/GOO//ALB/CRA/4/AE.SQUARROSA (244)  | 2.33 | MR |    |
| 201 | CPI8/GEDIZ/3/GOO//ALB/CRA/4/AE.SQUARROSA (273)  | 2.42 | MR |    |

|     |                                                 |      |    |    |
|-----|-------------------------------------------------|------|----|----|
| 202 | CPI8/GEDIZ/3/GOO//ALB/CRA/4/AE.SQUARROSA (296)  | 2.18 | MR |    |
| 203 | CPI8/GEDIZ/3/GOO//ALB/CRA/4/AE.SQUARROSA (305)  | 1.64 | R  |    |
| 204 | CPI8/GEDIZ/3/GOO//ALB/CRA/4/AE.SQUARROSA (334)  | 2.09 | MR |    |
| 205 | CPI8/GEDIZ/3/GOO//ALB/CRA/4/AE.SQUARROSA (358)  | 1.35 | R  |    |
| 206 | CPI8/GEDIZ/3/GOO//ALB/CRA/4/AE.SQUARROSA (409)  | 1.90 | MR |    |
| 207 | CPI8/GEDIZ/3/GOO//ALB/CRA/4/AE.SQUARROSA (439)  | 2.15 | MR |    |
| 208 | CPI8/GEDIZ/3/GOO//ALB/CRA/4/AE.SQUARROSA (461)  | 1.56 | R  |    |
| 209 | CPI8/GEDIZ/3/GOO//ALB/CRA/4/AE.SQUARROSA (533)  | 2.67 | MS |    |
| 210 | CPI8/GEDIZ/3/GOO//ALB/CRA/4/AE.SQUARROSA (629)  | 1.75 | MR |    |
| 211 | CPI8/GEDIZ/3/GOO//ALB/CRA/4/AE.SQUARROSA (633)  | 1.70 | MR |    |
| 212 | CPI8/GEDIZ/3/GOO//ALB/CRA/4/AE.SQUARROSA (637)  | 2.06 | MR |    |
| 213 | CPI8/GEDIZ/3/GOO//ALB/CRA/4/AE.SQUARROSA (659)  | 1.52 | R  |    |
| 214 | CPI8/GEDIZ/3/GOO//ALB/CRA/4/AE.SQUARROSA (684)  | 1.02 | R  |    |
| 215 | CPI8/GEDIZ/3/GOO//ALB/CRA/4/AE.SQUARROSA (698)  | 1.98 | MR |    |
| 216 | AE.SQUARROSA (1043)/4/CPI8/GEDIZ/3/GOO//ALB/CRA | 1.08 | R  |    |
| 217 | <b>CROC_1*</b>                                  | 3.74 | S  | 30 |
| 218 | CROC_1/AE.SQUARROSA (168)                       | 2.33 | MR |    |
| 219 | CROC_1/AE.SQUARROSA (170)                       | 2.11 | MR |    |
| 220 | CROC_1/AE.SQUARROSA (176)                       | 1.63 | R  |    |
| 221 | CROC_1/AE.SQUARROSA (177)                       | 2.86 | MS |    |
| 222 | CROC_1/AE.SQUARROSA (205)                       | 1.60 | MR |    |
| 223 | CROC_1/AE.SQUARROSA (210)                       | 1.74 | MR |    |
| 224 | CROC_1/AE.SQUARROSA (210)                       | 1.67 | MR |    |
| 225 | CROC_1/AE.SQUARROSA (210)                       | 1.65 | MR |    |
| 226 | CROC_1/AE.SQUARROSA (213)                       | 1.46 | R  |    |
| 227 | CROC_1/AE.SQUARROSA (215)                       | 1.92 | MR |    |
| 228 | CROC_1/AE.SQUARROSA (224)                       | 1.75 | MR |    |
| 229 | CROC_1/AE.SQUARROSA (224)                       | 1.25 | R  |    |
| 230 | CROC_1/AE.SQUARROSA (224)                       | 1.15 | R  |    |
| 231 | CROC_1/AE.SQUARROSA (224)                       | 1.08 | R  |    |



|     |                                          |      |    |    |
|-----|------------------------------------------|------|----|----|
| 232 | CROC_1/AE.SQUARROSA (229)                | 2.39 | MR |    |
| 233 | CROC_1/AE.SQUARROSA (239)                | 1.10 | R  |    |
| 234 | CROC_1/AE.SQUARROSA (256)                | 2.98 | MS |    |
| 235 | CROC_1/AE.SQUARROSA (275)                | 1.77 | MR |    |
| 236 | CROC_1/AE.SQUARROSA (298)                | 2.63 | MS |    |
| 237 | CROC_1/AE.SQUARROSA (310)                | 1.33 | R  |    |
| 238 | CROC_1/AE.SQUARROSA (333)                | 1.06 | R  |    |
| 239 | CROC_1/AE.SQUARROSA (397)                | 1.38 | R  |    |
| 240 | CROC_1/AE.SQUARROSA (493)                | 1.34 | R  |    |
| 241 | CROC_1/AE.SQUARROSA (516)                | 1.08 | R  |    |
| 242 | CROC_1/AE.SQUARROSA (517)                | 1.71 | MR |    |
| 243 | CROC_1/AE.SQUARROSA (518)                | 2.05 | MR |    |
| 244 | CROC_1/AE.SQUARROSA (662)                | 1.33 | R  |    |
| 245 | CROC_1/AE.SQUARROSA (725)                | 1.62 | MR |    |
| 246 | CROC_1/AE.SQUARROSA (826)                | 1.44 | R  |    |
| 247 | CROC_1/AE.SQUARROSA (886)                | 1.00 | R  |    |
| 248 | <b>D67.2/PARANA 66.270*</b>              | 3.72 | S  | 13 |
| 249 | D67.2/PARANA 66.270//AE.SQUARROSA (1148) | 1.36 | R  |    |
| 250 | D67.2/PARANA 66.270//AE.SQUARROSA (211)  | 1.67 | R  |    |
| 251 | D67.2/PARANA 66.270//AE.SQUARROSA (213)  | 2.34 | MR |    |
| 252 | D67.2/PARANA 66.270//AE.SQUARROSA (218)  | 1.12 | R  |    |
| 253 | D67.2/PARANA 66.270//AE.SQUARROSA (220)  | 1.58 | MR |    |
| 254 | D67.2/PARANA 66.270//AE.SQUARROSA (221)  | 2.00 | MR |    |
| 255 | D67.2/PARANA 66.270//AE.SQUARROSA (222)  | 2.16 | MR |    |
| 256 | D67.2/PARANA 66.270//AE.SQUARROSA (223)  | 1.55 | MR |    |
| 257 | D67.2/PARANA 66.270//AE.SQUARROSA (246)  | 2.05 | MR |    |
| 258 | D67.2/PARANA 66.270//AE.SQUARROSA (633)  | 1.91 | MR |    |
| 259 | D67.2/PARANA 66.270//AE.SQUARROSA (634)  | 1.73 | MR |    |
| 260 | D67.2/PARANA 66.270//AE.SQUARROSA (657)  | 1.91 | MR |    |
| 261 | D67.2/PARANA 66.270//AE.SQUARROSA (668)  | 1.03 | R  |    |

|     |                          |      |    |    |
|-----|--------------------------|------|----|----|
| 262 | <b>DECOY 1*</b>          | 3.50 | MS | 30 |
| 263 | DOY1/AE.SQUARROSA (1016) | 2.14 | MR |    |
| 264 | DOY1/AE.SQUARROSA (1018) | 2.04 | MR |    |
| 265 | DOY1/AE.SQUARROSA (1024) | 2.59 | MS |    |
| 266 | DOY1/AE.SQUARROSA (1026) | 1.87 | MR |    |
| 267 | DOY1/AE.SQUARROSA (1029) | 2.29 | MR |    |
| 268 | DOY1/AE.SQUARROSA (177)  | 2.56 | MS |    |
| 269 | DOY1/AE.SQUARROSA (188)  | 2.35 | MR |    |
| 270 | DOY1/AE.SQUARROSA (216)  | 1.56 | MR |    |
| 271 | DOY1/AE.SQUARROSA (255)  | 3.43 | MS |    |
| 272 | DOY1/AE.SQUARROSA (258)  | 2.29 | MR |    |
| 273 | DOY1/AE.SQUARROSA (267)  | 1.28 | R  |    |
| 274 | DOY1/AE.SQUARROSA (295)  | 1.30 | R  |    |
| 275 | DOY1/AE.SQUARROSA (322)  | 2.24 | MR |    |
| 276 | DOY1/AE.SQUARROSA (334)  | 1.68 | MR |    |
| 277 | DOY1/AE.SQUARROSA (360)  | 1.59 | MR |    |
| 278 | DOY1/AE.SQUARROSA (415)  | 2.41 | MR |    |
| 279 | DOY1/AE.SQUARROSA (428)  | 2.11 | MR |    |
| 280 | DOY1/AE.SQUARROSA (446)  | 1.63 | MR |    |
| 281 | DOY1/AE.SQUARROSA (447)  | 1.75 | MR |    |
| 282 | DOY1/AE.SQUARROSA (488)  | 2.06 | MR |    |
| 283 | DOY1/AE.SQUARROSA (507)  | 1.83 | MR |    |
| 284 | DOY1/AE.SQUARROSA (510)  | 1.87 | MR |    |
| 285 | DOY1/AE.SQUARROSA (515)  | 2.35 | MR |    |
| 286 | DOY1/AE.SQUARROSA (516)  | 1.43 | R  |    |
| 287 | DOY1/AE.SQUARROSA (517)  | 2.78 | MS |    |
| 288 | DOY1/AE.SQUARROSA (532)  | 2.73 | MS |    |
| 289 | DOY1/AE.SQUARROSA (540)  | 2.58 | MS |    |
| 290 | DOY1/AE.SQUARROSA (632)  | 1.48 | R  |    |
| 291 | AE.SQUARROSA (1026)/DOY1 | 2.51 | MR |    |

|     |                                 |      |    |    |
|-----|---------------------------------|------|----|----|
| 292 | AE.SQUARROSA (1043)/DOY1        | 1.90 | MR |    |
| 293 | <b>DVERD_2*</b>                 | 2.54 | MR | 13 |
| 294 | DVERD_2/AE.SQUARROSA (1022)     | 1.32 | R  |    |
| 295 | DVERD_2/AE.SQUARROSA (1026)     | 1.17 | R  |    |
| 296 | DVERD_2/AE.SQUARROSA (1029)     | 1.22 | R  |    |
| 297 | DVERD_2/AE.SQUARROSA (1031)     | 1.27 | R  |    |
| 298 | DVERD_2/AE.SQUARROSA (214)      | 1.52 | R  |    |
| 299 | DVERD_2/AE.SQUARROSA (221)      | 1.28 | R  |    |
| 300 | DVERD_2/AE.SQUARROSA (247)      | 1.43 | R  |    |
| 301 | DVERD_2/AE.SQUARROSA (247)      | 1.20 | R  |    |
| 302 | DVERD_2/AE.SQUARROSA (333)      | 1.20 | R  |    |
| 303 | DVERD_2/AE.SQUARROSA (507)      | 1.76 | R  |    |
| 304 | DVERD_2/T.URARTU (545)          | 2.92 | MS |    |
| 305 | AE.SQUARROSA (1031)/DVERD_2     | 1.13 | R  |    |
| 306 | AE.SQUARROSA (1029)/DVERD_2     | 1.77 | MR |    |
| 307 | <b>FALCIN_1*</b>                | 1.50 | R  | 5  |
| 308 | FALCIN/AE.SQUARROSA (312)       | 1.35 | R  |    |
| 309 | FALCIN/AE.SQUARROSA (389)       | 2.67 | MS |    |
| 310 | FALCIN_1/AE.SQUARROSA (1073)    | 2.06 | MR |    |
| 311 | FALCIN_1/AE.SQUARROSA (176)     | 1.78 | MR |    |
| 312 | FALCIN_1/AE.SQUARROSA (197)     | 1.63 | MR |    |
| 313 | <b>FGO/USA2111*</b>             | 2.47 | MR | 1  |
| 314 | FGO/USA2111//AE.SQUARROSA (658) | 1.08 | R  |    |
| 315 | <b>GAN*</b>                     | 1.06 | R  | 39 |
| 316 | GAN/AE.SQUARROSA (1080)         | 1.23 | R  |    |
| 317 | GAN/AE.SQUARROSA (163)          | 1.20 | R  |    |
| 318 | GAN/AE.SQUARROSA (180)          | 1.27 | R  |    |
| 319 | GAN/AE.SQUARROSA (182)          | 1.62 | MR |    |
| 320 | GAN/AE.SQUARROSA (201)          | 1.92 | MR |    |
| 321 | GAN/AE.SQUARROSA (206)          | 2.13 | MR |    |

|     |                        |      |    |
|-----|------------------------|------|----|
| 322 | GAN/AE.SQUARROSA (231) | 2.10 | MR |
| 323 | GAN/AE.SQUARROSA (233) | 1.14 | R  |
| 324 | GAN/AE.SQUARROSA (257) | 1.02 | R  |
| 325 | GAN/AE.SQUARROSA (264) | 1.21 | R  |
| 326 | GAN/AE.SQUARROSA (267) | 2.15 | MR |
| 327 | GAN/AE.SQUARROSA (268) | 2.26 | MR |
| 328 | GAN/AE.SQUARROSA (285) | 1.29 | R  |
| 329 | GAN/AE.SQUARROSA (296) | 1.24 | R  |
| 330 | GAN/AE.SQUARROSA (300) | 1.58 | MR |
| 331 | GAN/AE.SQUARROSA (335) | 1.00 | R  |
| 332 | GAN/AE.SQUARROSA (408) | 1.02 | R  |
| 333 | GAN/AE.SQUARROSA (413) | 1.11 | R  |
| 334 | GAN/AE.SQUARROSA (446) | 2.27 | MR |
| 335 | GAN/AE.SQUARROSA (459) | 1.54 | R  |
| 336 | GAN/AE.SQUARROSA (479) | 1.32 | R  |
| 337 | GAN/AE.SQUARROSA (522) | 1.86 | MR |
| 338 | GAN/AE.SQUARROSA (536) | 1.87 | MR |
| 339 | GAN/AE.SQUARROSA (620) | 1.28 | R  |
| 340 | GAN/AE.SQUARROSA (621) | 1.48 | R  |
| 341 | GAN/AE.SQUARROSA (623) | 1.04 | R  |
| 342 | GAN/AE.SQUARROSA (624) | 1.06 | R  |
| 343 | GAN/AE.SQUARROSA (633) | 1.00 | R  |
| 344 | GAN/AE.SQUARROSA (638) | 1.02 | R  |
| 345 | GAN/AE.SQUARROSA (643) | 1.38 | R  |
| 346 | GAN/AE.SQUARROSA (658) | 1.08 | R  |
| 347 | GAN/AE.SQUARROSA (668) | 1.23 | R  |
| 348 | GAN/AE.SQUARROSA (680) | 1.35 | R  |
| 349 | GAN/AE.SQUARROSA (721) | 2.29 | MR |
| 350 | GAN/AE.SQUARROSA (735) | 1.36 | R  |
| 351 | GAN/AE.SQUARROSA (741) | 1.00 | R  |

|     |                               |      |    |   |
|-----|-------------------------------|------|----|---|
| 352 | GAN/AE.SQUARROSA (768)        | 1.13 | R  |   |
| 353 | GAN/AE.SQUARROSA (779)        | 1.78 | MR |   |
| 354 | GAN/AE.SQUARROSA (890)        | 1.15 | R  |   |
| 355 | <b>GARZA/BOY*</b>             | 2.34 | MR | 7 |
| 356 | GARZA/BOY//AE.SQUARROSA (271) | 1.33 | R  |   |
| 357 | GARZA/BOY//AE.SQUARROSA (286) | 2.39 | MR |   |
| 358 | GARZA/BOY//AE.SQUARROSA (307) | 1.21 | R  |   |
| 359 | GARZA/BOY//AE.SQUARROSA (311) | 2.26 | MR |   |
| 360 | GARZA/BOY//AE.SQUARROSA (350) | 1.26 | R  |   |
| 361 | GARZA/BOY//AE.SQUARROSA (439) | 2.27 | MR |   |
| 362 | GARZA/BOY//AE.SQUARROSA (764) | 1.98 | MR |   |
| 363 | <b>GREEN_3*</b>               | 1.19 | R  | 1 |
| 364 | GREEN/AE.SQUARROSA (458)      | 1.00 | R  |   |
| 365 | <b>KAPUDE_1*</b>              | 2.13 | MR | 1 |
| 366 | KAPUDE/AE.SQUARROSA (175)     | 1.88 | MR |   |
| 367 | <b>LARU*</b>                  | 2.31 | MR | 4 |
| 368 | LARU/AE.SQUARROSA (309)       | 1.00 | R  |   |
| 369 | LARU/AE.SQUARROSA (309)       | 1.00 | R  |   |
| 370 | LARU/AE.SQUARROSA (333)       | 1.18 | R  |   |
| 371 | LARU/AE.SQUARROSA (TA2459)    | 1.41 | R  |   |
| 372 | <b>LCK59.61*</b>              | 3.18 | MS | 2 |
| 373 | LCK59.61/AE.SQUARROSA (308)   | 1.23 | R  |   |
| 374 | LCK59.61/AE.SQUARROSA (783)   | 3.47 | MS |   |
| 375 | <b>LOCAL RED*</b>             | 2.90 | MS | 7 |
| 376 | LOCAL RED/AE.SQUARROSA (189)  | 2.20 | MR |   |
| 377 | LOCAL RED/AE.SQUARROSA (219)  | 2.64 | MS |   |
| 378 | LOCAL RED/AE.SQUARROSA (220)  | 1.80 | MR |   |
| 379 | LOCAL RED/AE.SQUARROSA (221)  | 2.40 | MR |   |
| 380 | LOCAL RED/AE.SQUARROSA (222)  | 3.04 | MS |   |
| 381 | LOCAL RED/AE.SQUARROSA (223)  | 2.19 | MR |   |

|     |                                   |      |    |   |
|-----|-----------------------------------|------|----|---|
| 382 | LOCAL RED/AE.SQUARROSA (449)      | 1.42 | R  |   |
| 383 | <b>RABI//GS/CRA*</b>              | 1.63 | MR | 4 |
| 384 | RABI//GS/CRA/3/AE.SQUARROSA (190) | 2.01 | MR |   |
| 385 | RABI//GS/CRA/3/AE.SQUARROSA (457) | 1.54 | R  |   |
| 386 | RABI//GS/CRA/3/AE.SQUARROSA (891) | 1.08 | R  |   |
| 387 | RABI//GS/CRA/3/AE.SQUARROSA (904) | 1.57 | MR |   |
| 388 | <b>RASCON_37*</b>                 | 2.18 | MR | 2 |
| 389 | RASCON/AE.SQUARROSA (312)         | 1.08 | R  |   |
| 390 | RASCON/AE.SQUARROSA (367)         | 1.44 | R  |   |
| 391 | <b>ROK/KML*</b>                   | 2.72 | MS | 4 |
| 392 | ROK/KML//AE.SQUARROSA (214)       | 1.65 | MR |   |
| 393 | ROK/KML//AE.SQUARROSA (295)       | 2.03 | MR |   |
| 394 | ROK/KML//AE.SQUARROSA (333)       | 2.27 | MR |   |
| 395 | ROK/KML//AE.SQUARROSA (507)       | 2.70 | MS |   |
| 396 | <b>SCAUP*</b>                     | 3.85 | S  | 3 |
| 397 | SCA/AE.SQUARROSA (248)            | 2.90 | MS |   |
| 398 | SCA/AE.SQUARROSA (409)            | 1.58 | MR |   |
| 399 | SCA/AE.SQUARROSA (493)            | 1.98 | MR |   |
| 400 | <b>SCOOP_1*</b>                   | 1.06 | R  | 3 |
| 401 | SCOOP_1/AE.SQUARROSA (358)        | 1.03 | R  |   |
| 402 | SCOOP_1/AE.SQUARROSA (407)        | 1.00 | R  |   |
| 403 | SCOOP_1/AE.SQUARROSA (659)        | 1.00 | R  |   |
| 404 | <b>SCOT/MEXI_1*</b>               | 2.35 | MR | 1 |
| 405 | SCOT/MEXI_1//AE.SQUARROSA (186)   | 1.84 | MR |   |
| 406 | <b>SHAG_22*</b>                   | 1.50 | R  | 6 |
| 407 | SHAG_22/AE.SQUARROSA (1101)       | 1.20 | R  |   |
| 408 | SHAG_22/AE.SQUARROSA (227)        | 1.59 | MR |   |
| 409 | SHAG_22/AE.SQUARROSA (319)        | 1.67 | MR |   |
| 410 | SHAG_22/AE.SQUARROSA (530)        | 1.33 | R  |   |
| 411 | SHAG_22/AE.SQUARROSA (537)        | 1.55 | MR |   |

|     |                                                 |      |    |    |
|-----|-------------------------------------------------|------|----|----|
| 412 | SHAG_22/AE.SQUARROSA (539)                      | 1.47 | R  |    |
| 413 | <b>SNIPE/YAV79//DACK/TEAL*</b>                  | 1.53 | R  | 7  |
| 414 | SNIPE/YAV79//DACK/TEAL/3/AE.SQUARROSA (411)     | 1.20 | R  |    |
| 415 | SNIPE/YAV79//DACK/TEAL/3/AE.SQUARROSA (528)     | 1.02 | R  |    |
| 416 | SNIPE/YAV79//DACK/TEAL/3/AE.SQUARROSA (628)     | 1.00 | R  |    |
| 417 | SNIPE/YAV79//DACK/TEAL/3/AE.SQUARROSA (629)     | 1.25 | R  |    |
| 418 | SNIPE/YAV79//DACK/TEAL/3/AE.SQUARROSA (633)     | 1.03 | R  |    |
| 419 | SNIPE/YAV79//DACK/TEAL/3/AE.SQUARROSA (700)     | 1.08 | R  |    |
| 420 | SNIPE/YAV79//DACK/TEAL/3/AE.SQUARROSA (904)     | 1.13 | R  |    |
| 421 | <b>SORA*</b>                                    | 3.38 | MS | 14 |
| 422 | SORA/AE.SQUARROSA (191)                         | 2.68 | MS |    |
| 423 | SORA/AE.SQUARROSA (192)                         | 2.10 | MR |    |
| 424 | SORA/AE.SQUARROSA (192)                         | 1.68 | MR |    |
| 425 | SORA/AE.SQUARROSA (207)                         | 1.72 | MR |    |
| 426 | SORA/AE.SQUARROSA (208)                         | 2.49 | MR |    |
| 427 | SORA/AE.SQUARROSA (211)                         | 1.28 | R  |    |
| 428 | SORA/AE.SQUARROSA (215)                         | 1.25 | R  |    |
| 429 | SORA/AE.SQUARROSA (323)                         | 1.04 | R  |    |
| 430 | SORA/AE.SQUARROSA (442)                         | 1.13 | R  |    |
| 431 | SORA/AE.SQUARROSA (469)                         | 1.30 | R  |    |
| 432 | SORA/AE.SQUARROSA (617)                         | 1.15 | R  |    |
| 433 | SORA/AE.SQUARROSA (625)                         | 1.18 | R  |    |
| 434 | SORA/AE.SQUARROSA (684)                         | 1.39 | R  |    |
| 435 | SORA/AE.SQUARROSA (939)                         | 2.42 | MR |    |
| 436 | <b>STY,DR/CELTA//PALS/3/SRN_5*</b>              | 2.68 | MS | 2  |
| 437 | STY,DR/CELTA//PALS/3/SRN_5/4/AE.SQUARROSA (277) | 1.72 | MR |    |
| 438 | STY,DR/CELTA//PALS/3/SRN_5/4/AE.SQUARROSA (502) | 1.27 | R  |    |
| 439 | <b>TK SN1081*</b>                               | 2.88 | MS | 3  |
| 440 | TK SN1081/AE.SQUARROSA (222)                    | 1.19 | R  |    |
| 441 | TK SN1081/AE.SQUARROSA (222)                    | 1.06 | R  |    |

|     |                                                        |      |    |    |
|-----|--------------------------------------------------------|------|----|----|
| 442 | TK SN1081/AE.SQUARROSA (690)                           | 1.20 | R  |    |
| 443 | <b>YAR*</b>                                            | 3.66 | S  | 4  |
| 444 | YAR/AE.SQUARROSA (493)                                 | 1.77 | MR |    |
| 445 | YAR/AE.SQUARROSA (518)                                 | 1.33 | R  |    |
| 446 | YAR/AE.SQUARROSA (783)                                 | 1.48 | R  |    |
| 447 | YAR/AE.SQUARROSA (809)                                 | 1.04 | R  |    |
| 448 | <b>YAV_2/TEZ*</b>                                      | 2.94 | MS | 12 |
| 449 | YAV_2/TEZ//AE.SQUARROSA (1093)                         | 1.54 | R  |    |
| 450 | YAV_2/TEZ//AE.SQUARROSA (249)                          | 2.55 | MR |    |
| 451 | YAV_2/TEZ//AE.SQUARROSA (249)                          | 2.22 | MR |    |
| 452 | YAV_2/TEZ//AE.SQUARROSA (249)                          | 1.97 | MR |    |
| 453 | YAV_2/TEZ//AE.SQUARROSA (249)                          | 1.82 | MR |    |
| 454 | YAV_2/TEZ//AE.SQUARROSA (249)                          | 1.78 | MR |    |
| 455 | YAV_2/TEZ//AE.SQUARROSA (249)                          | 1.10 | R  |    |
| 456 | YAV_2/TEZ//AE.SQUARROSA (435)                          | 1.11 | R  |    |
| 457 | YAV_2/TEZ//AE.SQUARROSA (437)                          | 1.13 | R  |    |
| 458 | YAV_2/TEZ//AE.SQUARROSA (721)                          | 2.02 | MR |    |
| 459 | YAV_2/TEZ//AE.SQUARROSA (746)                          | 1.03 | R  |    |
| 460 | YAV_2/TEZ//AE.SQUARROSA (882)                          | 1.00 | R  |    |
| 461 | <b>YARMUK*</b>                                         | 2.79 | MS | 4  |
| 462 | YUK/AE.SQUARROSA (217)                                 | 1.61 | MR |    |
| 463 | YUK/AE.SQUARROSA (434)                                 | 1.10 | R  |    |
| 464 | YUK/AE.SQUARROSA (784)                                 | 2.08 | MR |    |
| 465 | YUK/AE.SQUARROSA (864)                                 | 1.97 | MR |    |
|     | <b>Lines without durum wheat parents in this study</b> |      |    |    |
| 466 | KUCUK/AE.SQUARROSA (1080)                              | 1.36 | R  |    |
| 467 | KUCUK/AE.SQUARROSA (458)                               | 1.03 | R  |    |
| 468 | KUCUK/AE.SQUARROSA (640)                               | 1.28 | R  |    |
| 469 | DUKEM_12/2*RASCON_21//AE.SQUARROSA (1090)              | 1.07 | R  |    |
| 470 | DUKEM_12/2*RASCON_21//AE.SQUARROSA (1100)              | 2.33 | MR |    |



|     |                                               |      |    |
|-----|-----------------------------------------------|------|----|
| 471 | SRN/AE.SQUARROSA (358)                        | 1.02 | R  |
| 472 | CADO/BOOMER_33//AE.SQUARROSA (504)            | 2.18 | MR |
| 473 | CADO/BOOMER_33//AE.SQUARROSA (651)            | 1.00 | R  |
| 474 | CADO/BOOMER_33//AE.SQUARROSA (949)            | 1.15 | R  |
| 475 | YAV79//DACK/RABI/3/SNIPE/4/AE.SQUARROSA (381) | 1.48 | R  |
| 476 | YAV79//DACK/RABI/3/SNIPE/4/AE.SQUARROSA (397) | 1.18 | R  |
| 477 | YAV79//DACK/RABI/3/SNIPE/4/AE.SQUARROSA (443) | 1.19 | R  |
| 478 | YAV79//DACK/RABI/3/SNIPE/4/AE.SQUARROSA (460) | 1.13 | R  |
| 479 | YAV79//DACK/RABI/3/SNIPE/4/AE.SQUARROSA (460) | 1.05 | R  |
| 480 | YAV79//DACK/RABI/3/SNIPE/4/AE.SQUARROSA (477) | 1.63 | MR |
| 481 | YAV79//DACK/RABI/3/SNIPE/4/AE.SQUARROSA (477) | 1.48 | R  |
| 482 | YAV79//DACK/RABI/3/SNIPE/4/AE.SQUARROSA (490) | 1.20 | R  |
| 483 | BACANORA T 88                                 | 1.83 | MR |
|     | Check resistant (Erik)                        | 1.00 | R  |
|     | Check susceptible (Glenlea)                   | 4.80 | S  |
|     | Check moderately resistant (6B-662)           | 2.50 | MR |
|     | Check moderately susceptible (6B-365)         | 3.40 | MS |

---

\* Durum wheat parents.

\*\*Averaged tan spot reaction of each genotype of SHW (twelve replications) and durum wheat parents (eight replications)

**Supplementary Table S2.** Candidate genes for significant marker-trait associations identified from *Triticum aestivum* (IWGSC), *Triticum turgidum* (Svevo.v1), *Aegilops tauschii* (Aet\_v4.0), and *Triticum dicoccoides* (WEWSeq\_v.1.0). Data was obtained from Ensembl <https://plants.ensembl.org/>

| Chromosome | Marker    | Gene                | Description                              |
|------------|-----------|---------------------|------------------------------------------|
| 1D         | 3026113   | AET1Gv20669700      | -                                        |
| 2D         | 1046601   | TraesCS2D02G432700  | -                                        |
| 5A         | 1200982   | TraesCS5A02G23860   | -                                        |
|            |           | TRITD5Av1G148960    | Galactoside 2-alpha-L-fucosyltransferase |
| 5A         | 3064590   | TraesCS5A02G254500  | -                                        |
|            |           | TRITD5Av1G155700    | F-box family protein                     |
| 6A         | 1862737   | TraesCS6A02G378800, | -                                        |
|            |           | TRITD6Av1G217060    | Cytochrome P450                          |
| 6A         | 100027398 | TraesCS6A02G381900  | -                                        |
|            |           | TRITD6Av1G217800    | F-box protein PP2                        |
| 6A         | 2266481   | TraesCS6A02G384200  | -                                        |
| 7D         | 16793126  | TraesCS7D02G203900  | -                                        |
|            |           | AET7Gv20511100      | -                                        |
|            |           | AET7Gv20511200      | -                                        |
| 7D         | 993425    | TraesCS7D02G524200  | -                                        |
|            |           | AET7Gv21298500      | -                                        |

**Supplementary Figure S1.** Principal component analysis of the synthetic wheat panel used in this study.

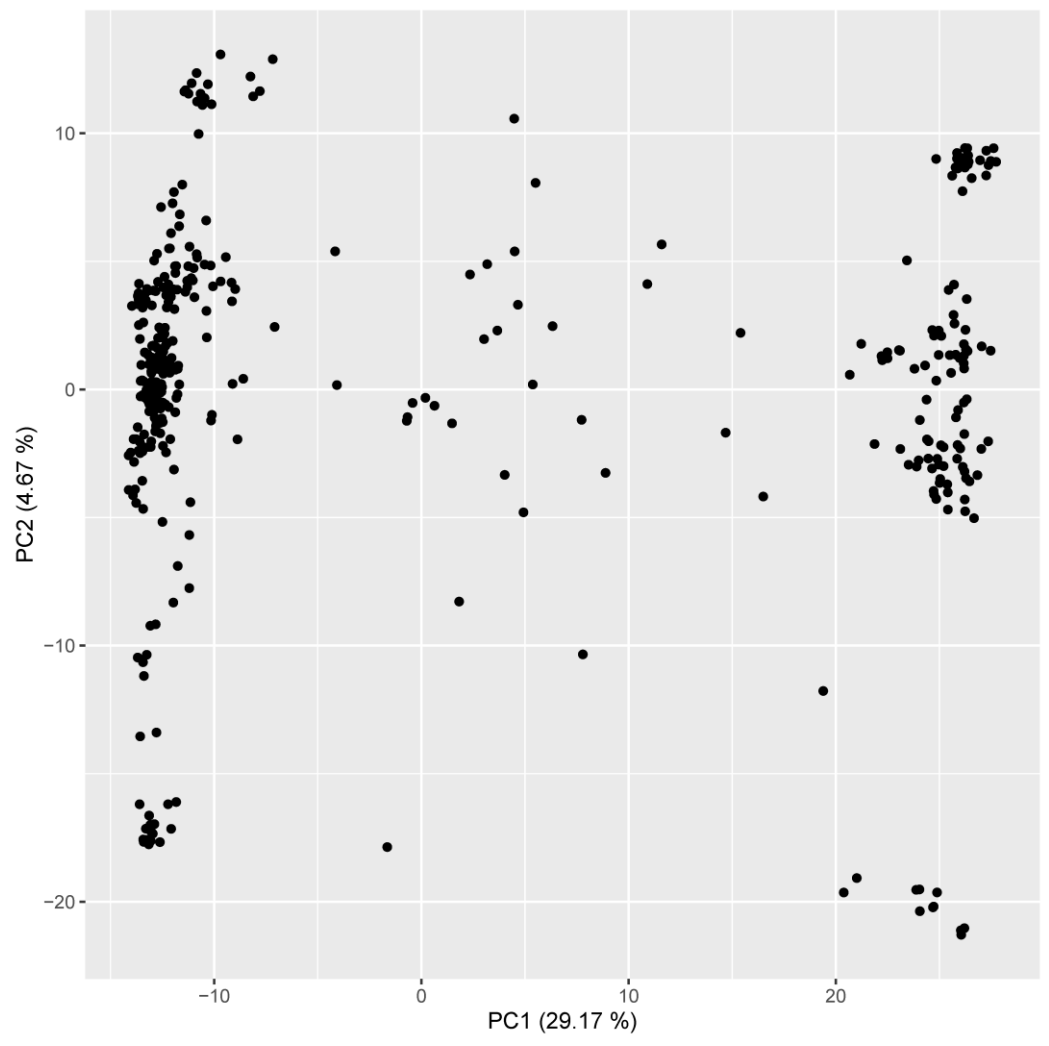

Supplement: s1 [file s1]
